## Report of Safety and Lack of Negative Effects of Augmented Reality Social Communication Aid for Children and Adults with Autism

Ned T. Sahin<sup>1,2\*</sup>, Neha U. Keshav<sup>1</sup>, Joseph P. Salisbury<sup>1</sup>, Arshya Vahabzadeh<sup>1,3</sup>

<sup>1</sup>Brain Power, 1 Broadway 14<sup>th</sup> Fl, Cambridge MA 02142, United States

<sup>2</sup>Department of Psychology, Harvard University, United States

<sup>3</sup>Department of Psychiatry, Massachusetts General Hospital, Boston

\* Corresponding Author. Ned T. Sahin, PhD, Brain Power, 1 Broadway 14th Fl, Cambridge, MA 02142, USA. Email: [sahin@post.harvard.edu](mailto:sahin@post.harvard.edu).

**Background:** Interest has been growing in the use of augmented reality (AR) based social communication interventions in autism spectrum disorders (ASD), yet little is known about their safety or negative effects, particularly in head-worn digital smartglasses. Research to understand the safety of smartglasses in people with ASD is crucial given that these individuals may have altered sensory sensitivity, impaired verbal and non-verbal communication, and may experience extreme distress in response to changes in routine or environment.

**Objective:** The objective of this report was to assess the safety and negative effects of the *Brain Power Autism System* (BPAS), a novel AR smartglasses-based social communication aid for children and adults with ASD. BPAS uses emotion-based artificial intelligence and a smartglasses hardware platform that keeps users engaged in the social world by encouraging “heads-up” interaction, unlike tablet- or phone-based apps.

**Methods:** A sequential series of 18 children and adults (mean age 12.2-years-old, range 4.4-21.5-years-old) with clinically diagnosed ASD were given the opportunity to use BPAS to learn emotion recognition, face-directed gaze, and managing transitions. Users and caregivers were interviewed about perceived negative effects of using BPAS, and had an opportunity to highlight any hardware or software design issues.

**Results:** The majority of users were able to wear and use BPAS (n=16, 89%). Caregivers reported no perceived negative effects in users during or after use of BPAS. Two users reported temporary negative effects: eye strain, dizziness, and nasal discomfort due to the smartglasses nose stabilizers. Most users and caregivers did not have any design concerns regarding the smartglasses hardware or software (users 77.8%, caregivers 88.9%). The only reported design concern was that the smartglasses became warm to the touch during extended use.

**Conclusions:** It is important to conduct research to understand the feasibility and safety associated with new emerging technologies for vulnerable populations such as ASD. This report found no significant negative effects in using an AR smartglasses based social communication aid across a wide age range of children and adults with ASD. Further research is needed to explore the efficacy and longer-term effects of such novel interventions.

**Keywords:** Smartglasses, Autism, Autism Spectrum Disorder, Augmented Reality, Social Communication, Technology, Safety.

## Introduction

Autism Spectrum Disorder (ASD) is a neurodevelopmental disorder affecting 1 in 68 U.S. children (1), and is characterized by social communication impairment and the presence of a restricted and/or repetitive range of interests and behaviors (2). The rising prevalence of ASD has increased demand for educational and behavioral services, often exhausting these limited resources (3, 4). There has been considerable interest in the development and study of technology-aided approaches for the social, cognitive, and behavioral challenges related to ASD (5). Technology-aided approaches may be especially suitable for people with ASD given that some of these individuals may show a natural propensity to utilize digital tools (6), display a fondness for electronic media (7), express a preference for standardized and predictable interactions (6), enjoy game-like elements (8) and favor computer-generated speech (9). However, technology may also have negative effects in some people with ASD. Individuals may become “addicted” to video games, and can become agitated or disruptive when attempting to disengage from playing video games (10). Anecdotally many caregivers describe meltdowns and other episodes of behavioral dysregulation in children with ASD when attempting to stop them playing smartphone- and/or tablet-based videogames.

Evidence suggests that a broad range of technology-aided interventions, such as those using computer programs and virtual reality (VR), may be effective in people with ASD (5). Technology-based interventions have been found to be beneficial for improving a wide range of skills and behaviors including aiding social and emotional skills (11-13), communication skills (12), academic skills (14), and challenging behaviors (11).

There is particular interest in interventions that help users learn skills while continuing to interact with the people and environment around them. Learning social-emotional skills in real life settings (such as in social skills groups), may increase the chance these skills generalize to the challenges of daily life (15). Augmented reality (AR) is a technology that holds considerable promise in this regard, as it allows for users to see and interact with the real world around them, while virtual objects and audio guidance are provided through a visual overlay and audio speakers. AR incorporates many of the features of VR that are thought to make VR technology well suited to the creation of learning tools for people with ASD (16), including being a primarily visual and auditory experience, being able to individualize the experience, and promoting generalization and decreasing rigidity through subtle gradual modifications in the experience (16). AR experiences can also be easily modified and personalized for each individual, an important consideration given that many people with ASD exhibit intense interest in a restricted range of topics, and may experience extreme distress if changes to their routine/environment occur (2). AR experiences are also not restricted solely to real-world limitations on time, space, and resources. Users may have the opportunity to interact with objects or experiences from historical or fantasy worlds, or a simplified cartoon-like interaction where the sensory and perceptual experiences may be reduced in complexity and/or magnitude.

Most ASD-related research into AR has focused on the use of smartphone- and/or tablet-based apps. While research has been limited, AR apps on smartphones/tablets have been shown to improve selective and sustained attention (17), attention to social cues (18), the ability to understand emotions and facial expressions in storybook characters (18), and navigating the physical world when attempting to find employment opportunities (19). However, smartphone-based AR may carry with it a risk of negative effects, including grip and postural strain, minor falls, and falls leading to major trauma and blindness (20, 21).

It is known that people with ASD face major challenges in coping with transitions, such as being asked to stop playing video games (10), it remains to be seen whether stopping the use of a more distracting/cognitively demanding smartphone/tablet results in more difficulty than encountered when stopping use of smartglasses (22). While there may be important differences between how people with ASD experience and use smartglasses compared to screen-based smartphones and tablets, little comparative research has been conducted. People using smartphones and tablets look directly down at the screen of these devices, and use their hands to interact with touch sensitive displays. These individuals may become distracted from real world events around them, performing less well on attentional tasks that are simultaneously demanded (22), and becoming less aware and engaged with the physical and social world around them (23). It could be conceivable that using smartphones may be an adaptive behavior in some individuals with ASD to minimize the stress and sensory stimuli that they encounter from the real world. Smartglasses may not provide the same level of real world disengagement, as users appear to require less cognitive load to use them, and appear to become less distracted by them compared to smartphones (22). Smartglasses require users to continue to remain heads-up and visually engaged with the real-world around them. Unlike screen-based devices, smartglasses feature a transparent optical display, thereby requiring users to continue to pay attention to the physical environment around them as they use the device. Additionally, people with ASD face major challenges in coping with transitions in activities (2) such as being asked to stop playing video games (10), so it remains to be seen whether stopping use of a more distracting/cognitively demanding smartphone/tablet results in more difficulty than encountered when stopping use of smartglasses.

While AR has been investigated as an educational strategy in ASD children for at least a decade (24), minimal research has been conducted into the safety of head-mounted AR in ASD populations. Head-mounted AR, delivered on smartglasses, may have a number of notable advantages compared to smartphone- or tablet-based AR. Despite these gaps in knowledge, it is thought that the adoption of AR smartglasses will be driven by their ability to improve social interactions and relationships, make life more efficient, and provide enjoyment and fun to the user (25). AR smartglasses contain a wide array of sensors that can collect quantitative data that may well help research efforts in the digital phenotyping of neurobehavioral conditions (26). To our knowledge, only a couple of reports have described the experience of people with ASD with modern VR headsets (27, 28), and to our knowledge, we have published the first reports of the use of AR smartglasses in children with ASD (26, 29, 30).

There remains a considerable need to investigate how children and adults with ASD would respond to social and behavioral coaching provided through AR smartglasses (26). Important initial considerations are determining the safety of such an approach and assessing potential negative effects. People with ASD may have sensory, motor, and cognitive challenges that warrant special attention when using such technology. Firstly, ASD is often accompanied by hyper- or hypo-reactivity to sensory inputs such as touch, sound, and sight (2). Altered sensory reactivity is not only prevalent in the ASD population but it is also highly heterogeneous in nature, and may represent a series of sensory subtypes (31). It is therefore important to see if individuals can tolerate wearing smartglasses for an extended period while monitoring how they respond to the visual and auditory cues delivered through the device. Secondly, ASD is often associated with altered motor movements, either seen as repetitive behaviors that are identified as “core” symptoms of ASD, or impairments of motor coordination. It is important to assess how motor challenges may affect how people with ASD utilize AR smartglasses (32). Additional considerations should include the ability of people with ASD to remain attentive and be able to focus on using smartglasses as part of social communication training, especially given the high rate of comorbidity between ASD and attention deficit hyperactivity disorder (33). VR research

has reported potential side effects that include eye strain, headache, and disorientation during use of a VR headset (34), although a recent brief report noted that people with ASD experienced relatively few negative effects when using a modern VR headset (28). Instruction manuals for AR smartglasses identify potential side effects as being nausea, motion sickness, dizziness, disorientation, headache, fatigue, eye strain, dry eyes, and seizures (35), although their occurrence among users with ASD has not been studied. It may be challenging to assess the negative effects of such technology in people who may already experience challenges in communicating their experiences, therefore researchers should carefully observe users with ASD, ask for their feedback, and also seek feedback from their caregivers in order to have a more sensitive method of detecting any negative effects. Interviews and questionnaires intended to probe the acceptability of these technologies need to use especially clear and concise language, with the use of visual or other communication aids as appropriate.

## Aim of Research

In this paper we report on safety and negative effects of using *the Brain Power Autism System* (BPAS) in children and adults with ASD. BPAS is a social communication aid that consists of AR smartglasses with apps that allow children and adults with ASD to coach themselves on important socio-emotional and cognitive skills (26, 29, 30). Skills include emotion recognition, socially salient face-directed gaze, self-regulation, and transition management (26). Users learn through gamified interactions and a combination of intrinsic and extrinsic rewards for successfully completing tasks. In certain situations, such as coaching of appropriate face-directed gaze and emotion recognition, BPAS is designed to be used while the user is interacting with another person. The system was designed using an iterative process where continuous feedback from people with ASD, clinicians, neuroscientists, educators, caregivers, design specialists, and engineers, helped to develop the system that was used in this report. Additionally, the facial affective analytics component of BPAS was developed in partnership with Affectiva, an emotion artificial intelligence company. The work was also made possible by Google, Inc., now known as Alphabet, Inc., who provided substantial hardware and well as guidance in engineering. Brain Power, the company that developed the BPAS, has been a long-term Glass partner in the Glass Enterprise Partnership Program. BPAS is designed to be accessible to people with ASD, and to minimize potential negative effects. A number of elements were used to achieve this, including but not limited to the use of calming tones, use of emotional artificial intelligence, minimization of audio and visual sensory load, graduated transitions between learning segments, and modification of the functionality of the tactile input surfaces of the smartglasses. In this study the focus was on understanding the safety and potential negative effects that may be experienced by children and adults with ASD as they used AR smartglasses delivering cognitive and social self-coaching apps.

## Methods

The methods and procedures of this study were approved by Asentral, Inc., Institutional Review Board, an affiliate of the Commonwealth of Massachusetts Department of Public Health.

### User Recruitment

A sequential sample of 18 children and adults with ASD were recruited from a database of individuals who completed a web-based sign up form expressing interest in our study (mean age 12.2 years, range: 4.4 – 21.5 years; Table 1). Users included males and females, both verbal and non-verbal, and represented a wide range of ASD severity levels. Users had Social Communication Questionnaire scores from 6 – 28, with an average of 18.8. The Social Communication Questionnaire is a validated way to obtain diagnostic and screening information about ASD (36, 37). Written consent was obtained from the legal guardians of children and from

cognitively-able adults. Participants between 7 and 17 years-old provided written assent, when possible. In this report, every user was accompanied by a caregiver, and users and caregivers could exit the session at any time and for any reason.

| <b>Table 1: Demographics</b>                                        |                    |                                |
|---------------------------------------------------------------------|--------------------|--------------------------------|
| <b>Number of users</b>                                              | 18                 |                                |
| <b>Age (mean +/- SD)</b>                                            | 12.2 +/- 5.2       | Range = 4.4 years - 21.5 years |
| <b>Participant gender</b>                                           | Male: 16 (88.9%)   | Female: 2 (11.1%)              |
| <b>Verbal or nonverbal</b>                                          | Verbal: 16 (88.9%) | Nonverbal: 2 (11.1%)           |
| <b>Social Communication Questionnaire (SCQ) Score (mean +/- SD)</b> | 18.8 +/- 6.75      | Range = 6 - 28                 |

## **Exclusions**

Individuals who had expressed interest via the website signup but who had a known history of epilepsy or seizure disorder were not enrolled in this study. Users who had any uncontrolled or severe medical or mental health condition that would make participation in the study predictably hazardous were also not enrolled.

## **Data Collection Procedure**

Users and caregivers had the opportunity to wear BPAS. In this report, the base smartglasses technology that was utilized was Google Glass Explorer Edition (**Figure 1**). Users who could physically wear the smartglasses for at least one minute were allowed to proceed to trying the different BPAS social and cognitive coaching apps over a period of 1-1.5 hours. The level of variability required in the session length to use the range of apps was reflective of the considerable range of ASD severity in the user group. Users interacted with their caregivers while they practiced with the apps, and were required to take off and then put the smartglasses back on (**Figure 2**). Following the experience with the system, structured interviews were conducted with users and their caregivers. The structured interviews focused on identifying any perceived negative effects of using the system, and allowed for comments/concerns to be raised about the design of the smartglasses hardware and the apps.

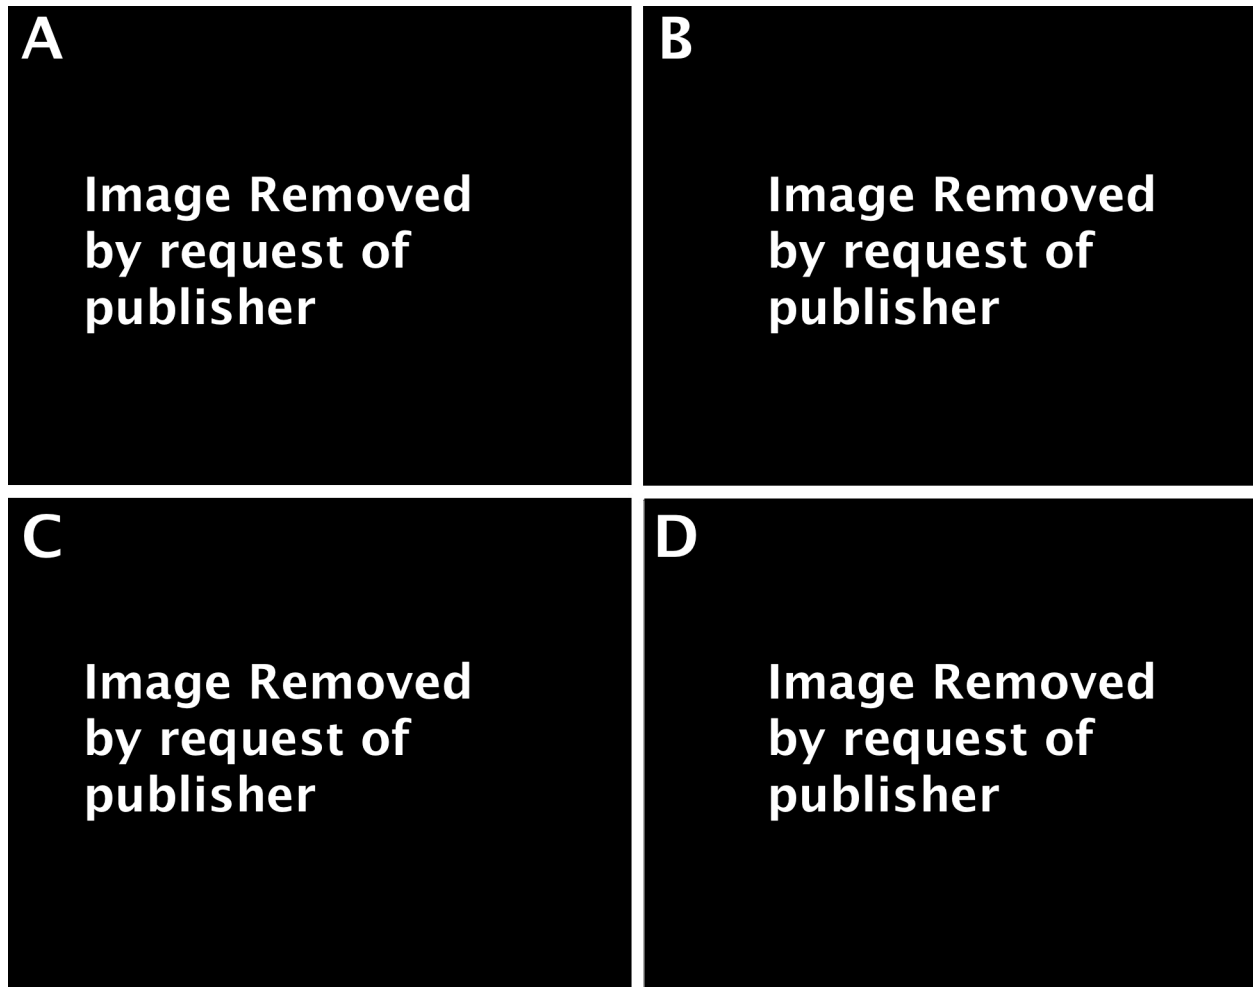

**Figure 1 (A-D): Four representative trial participants wearing the Brain Power Autism System. All pictures are used with user / caregiver permission.**

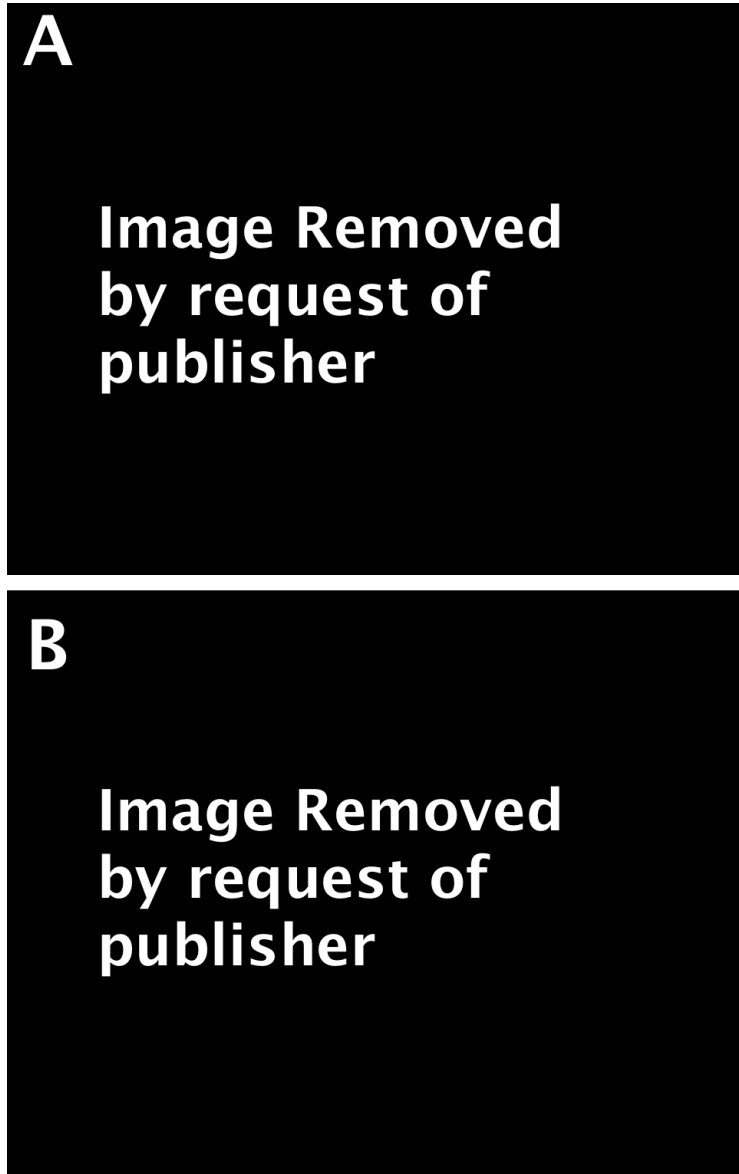

**Figure 2 (A,B) Brain Power Autism System User-Caregiver setup.** In each session, the participant and caregiver sit facing one another, promoting 'heads-up' social interaction while trialing BPAS apps. *All pictures are used with user / caregiver permission.*



## Results

Sixteen of the 18 users (89%) tolerated wearing BPAS smartglasses for at least one minute. The two users who did not tolerate this initial testing did not use BPAS apps. While both of these two users and their caregivers did not report any adverse effects, the users did not express an interest in wearing BPAS and continuing the testing session. It was noted that both users were not verbal, and were relatively young, aged 5.5 and 5.8 years. Of the remaining users, 14 out of 16 users (87.5%), and 16 out of 16 caregivers (100%) reported no minor negative effects, and 100% of caregivers and users reported no major negative effects (**Table 2**)(**Figure 3**).

The three instances of user negative effects were all mild in nature, transitory in duration, and did not result in the session being stopped. The reported negative effects were one case of dizziness, one case of eye strain, and one instance of initial nasal bridge discomfort. The caregiver of the user experiencing dizziness reported that the effect may be related to the user not wearing his prescription glasses, and he had previously experienced similar dizziness when he had tried a modern VR headset. This same user also experienced initial discomfort with the nose pads, but resolved the discomfort with adjustment of the placement of the smartglasses. The user who had complained of eye strain resolved the issue with a 20-second break in testing.

The majority of users and caregivers did not have any design concerns about the system (77.8% and 88.9% respectively) (**Table 3**). The only design concern highlighted by users and caregivers was that the smartglasses became warm to the touch during use, although this did not result in any negative effects.

| <b>Table 2: Negative Effects</b>                                      | <b>User (% , n)</b> | <b>Caregiver (% , n)</b> | <b>Notes</b>                                                                            |
|-----------------------------------------------------------------------|---------------------|--------------------------|-----------------------------------------------------------------------------------------|
| <b>Gastrointestinal (nausea, vomiting)</b>                            | 0%, 0               | 0%, 0                    | None reported or observed                                                               |
| <b>Ophthalmic (eye strain, dry eyes, changes in vision)</b>           | 5.6%, 1             | 0%, 0                    | Eye strain complaint, user took 20 second break and continued without further complaint |
| <b>Motor (trips, falls, abnormal motor movements)</b>                 | 0%, 0               | 0%, 0                    | None reported or observed                                                               |
| <b>Behavioral (tantrums, meltdowns)</b>                               | 0%, 0               | 0%, 0                    | None reported or observed                                                               |
| <b>Dermatologic (skin injury or burns, skin irritation)</b>           | 0%, 0               | 0%, 0                    | None reported or observed                                                               |
| <b>Any complaint of discomfort</b>                                    | 5.6%, 1             | 0%, 0                    | Nose pieces initially caused one user discomfort.                                       |
| <b>Minor neurological (headache, dizziness)</b>                       | 5.6%, 1             | 0%, 0                    | One complaint of dizziness.                                                             |
| <b>Major neurological (seizures, dystonia, loss of consciousness)</b> | 0%, 0               | 0%, 0                    | None                                                                                    |

| <b>Table 3: Design Concerns</b>     | <b>User (% , n)</b> | <b>Caregiver (% , n)</b> | <b>Notes</b>                                                                     |
|-------------------------------------|---------------------|--------------------------|----------------------------------------------------------------------------------|
| <b>BPAS smartglasses (hardware)</b> | 22.2%, 4            | 11.1%, 2                 | Users and caregivers reported the smartglasses becoming warm after continued use |
| <b>BPAS applications (software)</b> | 0%, 0               | 0%, 0                    | None reported or observed                                                        |



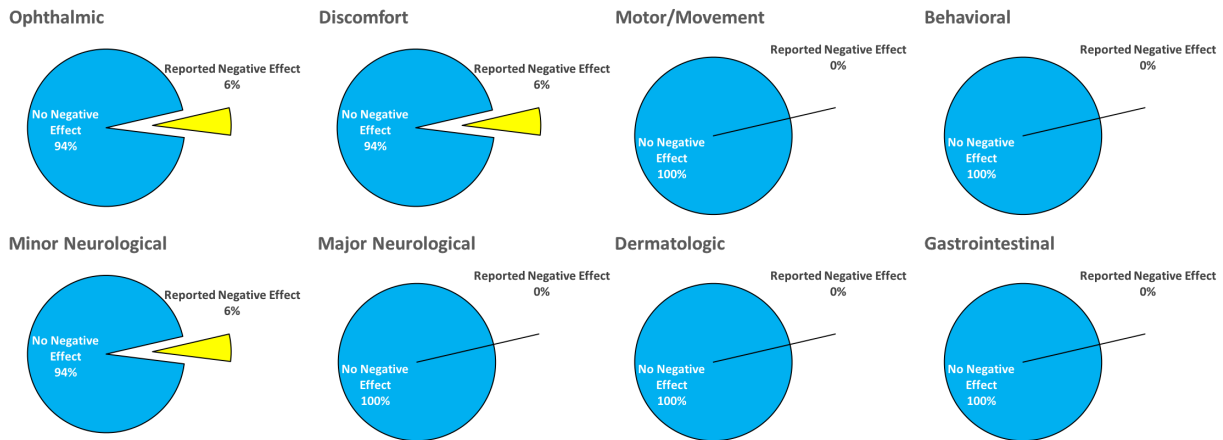

**Figure 3 User reported negative effects by category.** Three negative effects that were reported including one episode of eye strain (Ophthalmic), one episode of nasal bridge discomfort (Discomfort), and one episode of dizziness (Minor Neurological).

## Discussion

There are a wide range of technologies that are being developed to help individuals with ASD overcome their social, behavioral, and educational challenges. Because ASD is associated with a range of sensory, motor, and cognitive issues, it is important to investigate the safety and negative effects of using these technologies.

This paper explored the use of BPAS, a novel technological system that uses AR smartglasses to deliver social and cognitive coaching to children and adults with ASD. The focus was on exploring safety and negative effects of using this technology across a broad age and severity range of children and adults with ASD.

The system resulted in few reported negative effects; those that were encountered were minor in severity, and did not stop the testing of BPAS. All three the negative effects were reported by users, and there were no caregiver reported negative effects. This highlights how important it is to continue to engage and learn from children and adults with ASD, and not just rely on the reporting of others. Two users who were both non-verbal could not initially wear the smartglasses for a sustained period, and were therefore unable to try testing the system. This suggests that a small group of people with ASD may struggle to utilize current AR smartglasses. In the rest of the individuals who managed to wear and subsequently test the BPS, there were no observed major negative effects, including behavioral episodes (tantrums or meltdowns), seizures, or falls.

Design concerns were raised by two caregivers and four users who noticed a feeling of warmth from the external side of the hardware after extended use. However, this did not result in any reported negative effects.

The relative lack of negative effects is an important finding across such a wide age and severity range of people with ASD, and indirectly supports recent research demonstrating minimal negative effects when modern VR headsets were used by people with ASD (28). It was encouraging to see that despite concerns of how ASD-related sensory, motor, and cognitive

issues may potentially impact the user of the BPAS, the majority of users were able to wear the smartglasses and use the system without any negative effects. It was also reassuring that there were no behavioral problems reported when users were asked to stop using the smartglasses, especially given earlier outlined concerns regarding the potential for distress around transitions involving technology.

Such findings may not generalize to other AR smartglasses, which may be based on different/unmodified hardware, or may be using other software apps. There remains a critical need to conduct further research to understand the feasibility and safety associated with new emerging technologies, especially those that may be used in vulnerable populations such as ASD. The use of AR smartglasses may have considerable potential as an augmentative technology in helping people with ASD, particularly when they are shown to be usable and safe in the ASD population, and when supported by robust evidence of efficacy. Finally, while this report does not identify any short term adverse events, as with any technology, further research is warranted to explore the positive and negative effects of longer term use.

## REFERENCES

1. Developmental DMNSY, Investigators P. Prevalence of autism spectrum disorder among children aged 8 years-autism and developmental disabilities monitoring network, 11 sites, United States, 2010. *Morbidity and mortality weekly report Surveillance summaries* (Washington, DC: 2002). 2014;63(2):1.
2. Association AP. *Diagnostic and Statistical Manual of Mental Disorders (DSM-5®)*: American Psychiatric Pub; 2013.
3. Kogan MD, Strickland BB, Blumberg SJ, Singh GK, Perrin JM, van Dyck PC. A national profile of the health care experiences and family impact of autism spectrum disorder among children in the United States, 2005–2006. *Pediatrics*. 2008;122(6):e1149-e58.
4. Boyle CA, Boulet S, Schieve LA, Cohen RA, Blumberg SJ, Yeargin-Allsopp M, et al. Trends in the prevalence of developmental disabilities in US children, 1997–2008. *Pediatrics*. 2011;127(6):1034-42.
5. Grynszpan O, Weiss PL, Perez-Diaz F, Gal E. Innovative technology-based interventions for autism spectrum disorders: a meta-analysis. *Autism*. 2014;18(4):346-61.
6. Golan O, Baron-Cohen S. Systemizing empathy: Teaching adults with Asperger syndrome or high-functioning autism to recognize complex emotions using interactive multimedia. *Development and psychopathology*. 2006;18(02):591-617.
7. Shane HC, Albert PD. Electronic screen media for persons with autism spectrum disorders: Results of a survey. *Journal of autism and developmental disorders*. 2008;38(8):1499-508.
8. Mayes SD, Calhoun SL. Analysis of WISC-III, Stanford-Binet: IV, and academic achievement test scores in children with autism. *Journal of autism and developmental disorders*. 2003;33(3):329-41.
9. Schlosser RW, Blischak DM. Is there a role for speech output in interventions for persons with autism? A review. *Focus on Autism and Other Developmental Disabilities*. 2001;16(3):170-8.
10. Mazurek MO, Engelhardt CR. Video game use and problem behaviors in boys with autism spectrum disorders. *Research in Autism Spectrum Disorders*. 2013;7(2):316-24.
11. Ramdoss S, Lang R, Fragale C, Britt C, O'Reilly M, Sigafoos J, et al. Use of computer-based interventions to promote daily living skills in individuals with intellectual disabilities: A systematic review. *Journal of Developmental and Physical Disabilities*. 2012;24(2):197-215.
12. Ramdoss S, Lang R, Mulloy A, Franco J, O'Reilly M, Didden R, et al. Use of computer-based interventions to teach communication skills to children with autism spectrum disorders: A systematic review. *Journal of Behavioral Education*. 2011;20(1):55-76.
13. Ramdoss S, Machalicek W, Rispoli M, Mulloy A, Lang R, O'Reilly M. Computer-based interventions to improve social and emotional skills in individuals with autism spectrum disorders: A systematic review. *Developmental neurorehabilitation*. 2012;15(2):119-35.
14. Pennington RC. Computer-assisted instruction for teaching academic skills to students with autism spectrum disorders: A review of literature. *Focus on Autism and Other Developmental Disabilities*. 2010;25(4):239-48.

15. Reichow B, Steiner AM, Volkmar F. Cochrane review: social skills groups for people aged 6 to 21 with autism spectrum disorders (ASD). *Evidence-Based Child Health: A Cochrane Review Journal*. 2013;8(2):266-315.
16. Strickland D. Virtual reality for the treatment of autism. *Studies in health technology and informatics*. 1997;81-6.
17. Escobedo L, Tentori M, Quintana E, Favela J, Garcia-Rosas D. Using augmented reality to help children with autism stay focused. *IEEE Pervasive Computing*. 2014;13(1):38-46.
18. Chen C-H, Lee I-J, Lin L-Y. Augmented reality-based video-modeling storybook of nonverbal facial cues for children with autism spectrum disorder to improve their perceptions and judgments of facial expressions and emotions. *Computers in Human Behavior*. 2016;55:477-85.
19. McMahan D, Cihak DF, Wright R. Augmented reality as a navigation tool to employment opportunities for postsecondary education students with intellectual disabilities and autism. *Journal of Research on Technology in Education*. 2015;47(3):157-72.
20. Radu I, Guzdial K, Avram S, editors. An Observational Coding Scheme for Detecting Children's Usability Problems in Augmented Reality. *Proceedings of the 2017 Conference on Interaction Design and Children*; 2017: ACM.
21. Franchina M, Sinkar S, Ham B, Lam GC. A blinding eye injury caused by chasing Pokemon. *Med J Aust*. 2017;206(9):384.
22. He J, Ellis J, Choi W, Wang P. Driving while reading using Google glass versus using a smart phone: which is more distracting to driving performance. *City*. 2015.
23. Chen P-L, Pai C-W. Smartphone gaming is associated with pedestrians' head-turning performances: an observational study of street-crossing behaviours at uncontrolled intersection in Taipei. *International Journal of Sustainable Transportation*. 2017(just-accepted):00-.
24. Richard E, Billaudeau V, Richard P, Gaudin G, editors. Augmented reality for rehabilitation of cognitive disabled children: A preliminary study. *Virtual Rehabilitation, 2007*; 2007: IEEE.
25. Rauschnabel PA, Brem A, Ro Y. Augmented reality smart glasses: definition, conceptual insights, and managerial importance. Unpublished Working Paper, The University of Michigan-Dearborn, College of Business. 2015.
26. Liu R, Salisbury JP, Vahabzadeh A, Sahin NT. Feasibility of an Autism-Focused Augmented Reality Smartglasses System for Social Communication and Behavioral Coaching. *Frontiers in Pediatrics*. 2017;5(145).
27. Newbutt N, Sung C, Kuo HJ, Leahy MJ. The acceptance, challenges, and future applications of wearable technology and virtual reality to support people with autism spectrum disorders. *Recent Advances in Technologies for Inclusive Well-Being*: Springer; 2017. p. 221-41.
28. Newbutt N, Sung C, Kuo H-J, Leahy MJ, Lin C-C, Tong B. Brief report: a pilot study of the use of a virtual reality headset in autism populations. *Journal of autism and developmental disorders*. 2016;46(9):3166-76.
29. Vahabzadeh A, Keshav NU, Salisbury JP, Sahin NT. Preliminary Report on the Impact of Smartglasses-based Behavioral and Social Communication Aid on Hyperactivity in Children and Adults with Autism. *bioRxiv*. 2017.

30. Keshav NU, Salisbury JP, Vahabzadeh A, Sahin NT. But will they even wear it? Exploring the tolerability of social communication coaching smartglasses in children and adults with autism. *bioRxiv*. 2017.
31. Ausderau KK, Sideris J, Little LM, Furlong M, Bulluck JC, Baranek GT. Sensory subtypes and associated outcomes in children with autism spectrum disorders. *Autism Research*. 2016;9(12):1316-27.
32. Fournier KA, Hass CJ, Naik SK, Lodha N, Cauraugh JH. Motor coordination in autism spectrum disorders: a synthesis and meta-analysis. *Journal of autism and developmental disorders*. 2010;40(10):1227-40.
33. Ronald A, Simonoff E, Kuntsi J, Asherson P, Plomin R. Evidence for overlapping genetic influences on autistic and ADHD behaviours in a community twin sample. *Journal of Child psychology and Psychiatry*. 2008;49(5):535-42.
34. LaViola Jr JJ. A discussion of cybersickness in virtual environments. *ACM SIGCHI Bulletin*. 2000;32(1):47-56.
35. Microsoft. Health & Safety <https://www.microsoft.com/en-us/hololens/legal/health-and-safety-information>; Microsoft; 2017 [
36. Rutter M, Bailey A, Lord C. The social communication questionnaire: Manual: Western Psychological Services; 2003.
37. Chandler S, Charman T, Baird G, Simonoff E, Loucas T, Meldrum D, et al. Validation of the social communication questionnaire in a population cohort of children with autism spectrum disorders. *Journal of the American Academy of Child & Adolescent Psychiatry*. 2007;46(10):1324-32.
